# Supplementary material for: Multimodal genome-wide survey of progressing and non-progressing breast ductal carcinoma in-situ
Source: PubMed Central journal article supplement (PMC11616160; doi:10.1186/s13058-024-01927-1), 2024-12-04

**CHR 1****DCIS non-progressor**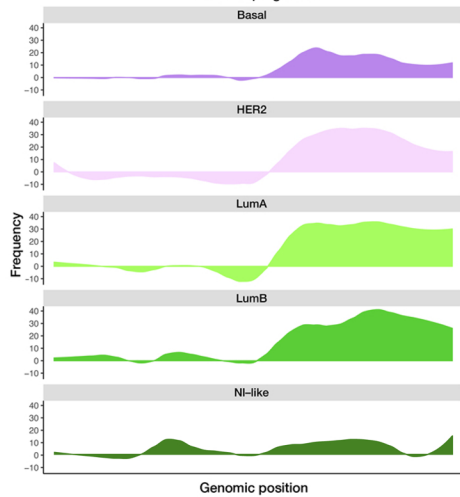**DCIS Progressor**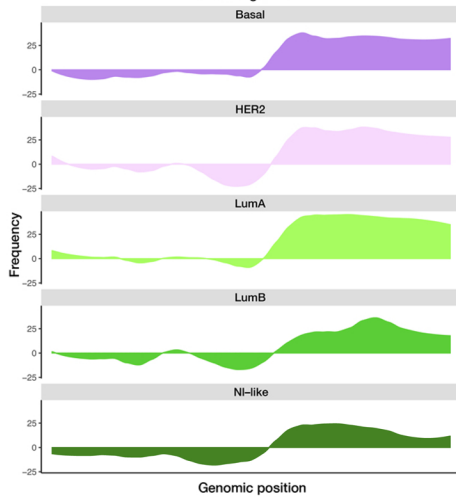**IBC (TCGA)**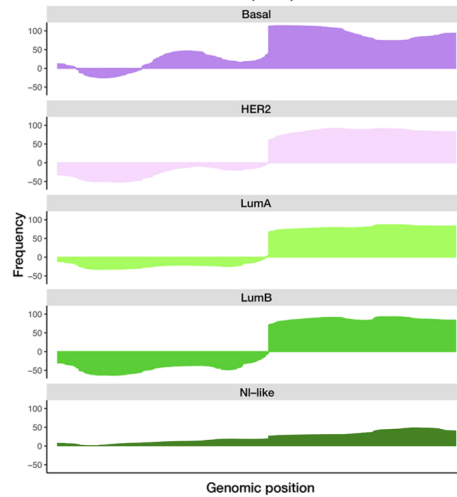**CHR 2****DCIS non-progressor**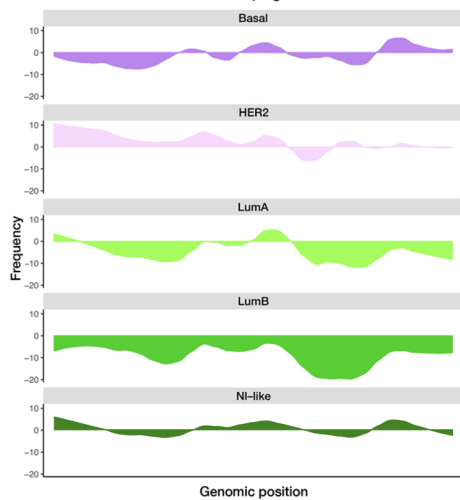**DCIS Progressor**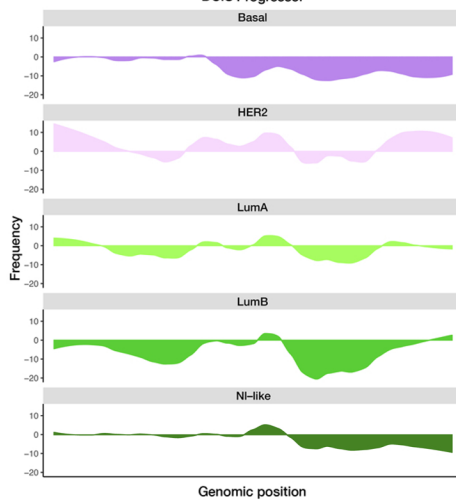**IBC (TCGA)**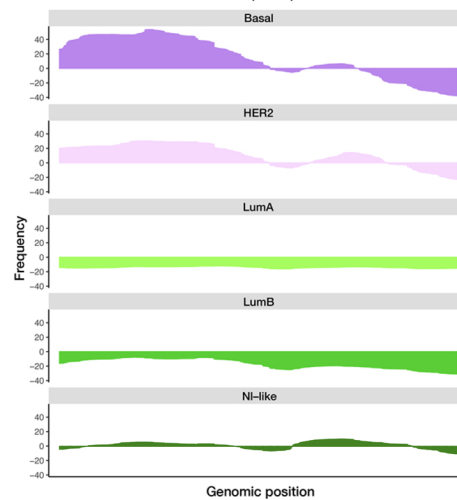**CHR 3****DCIS non-progressor**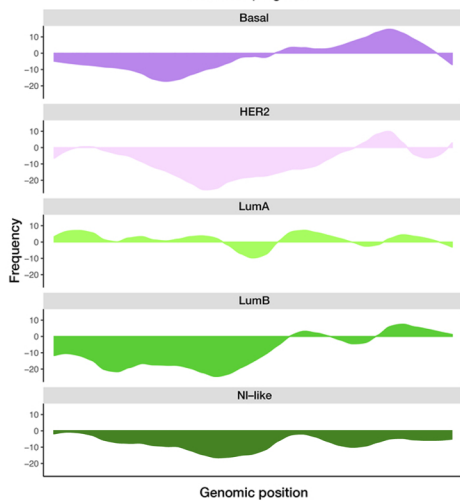**DCIS Progressor**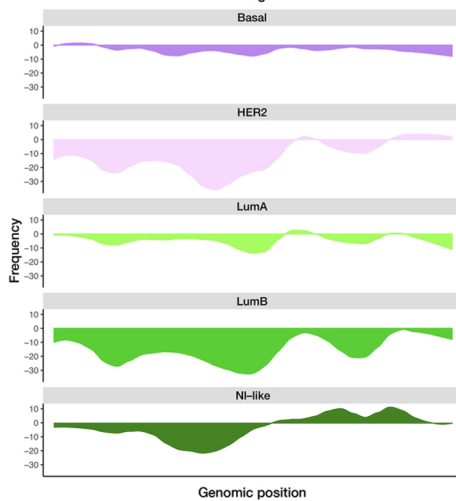**IBC (TCGA)**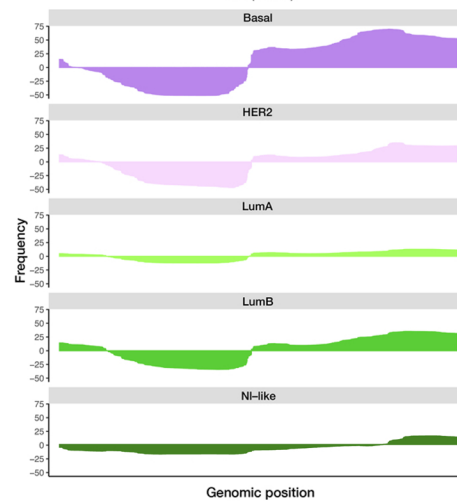

CHR 4

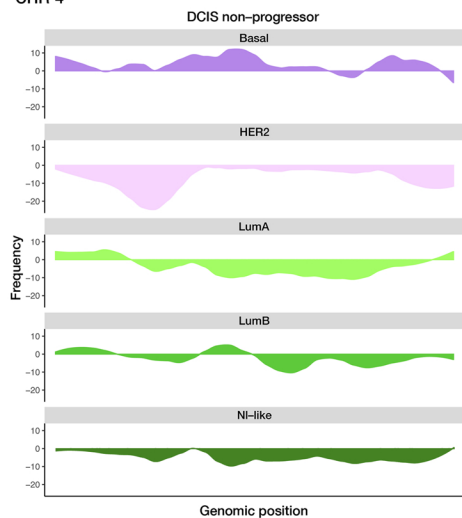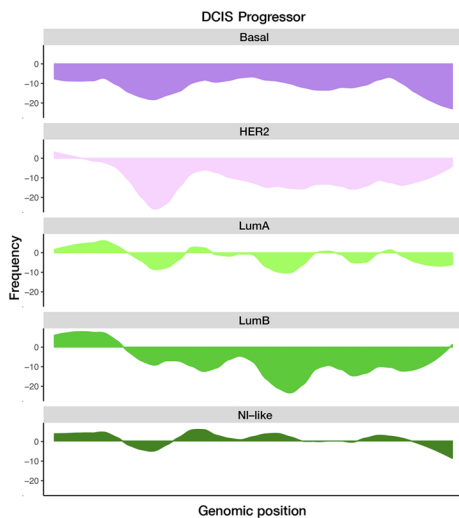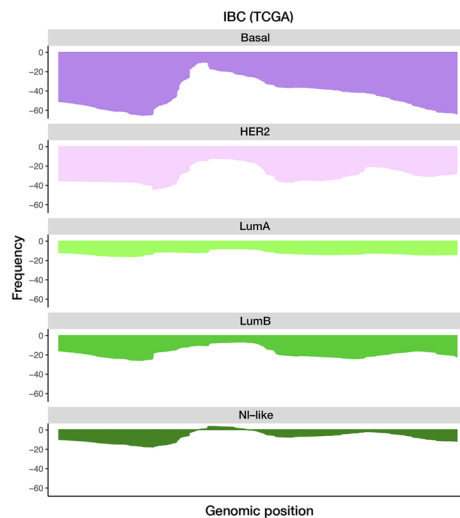

CHR 6

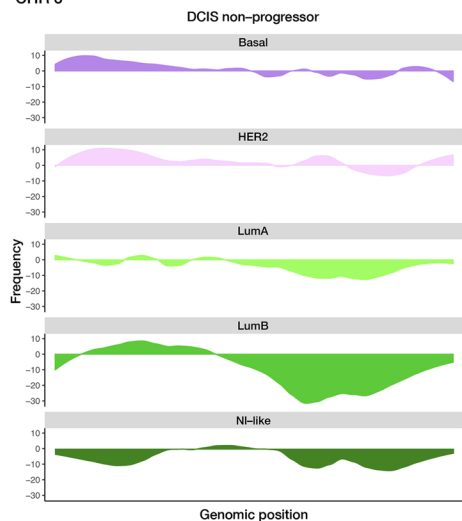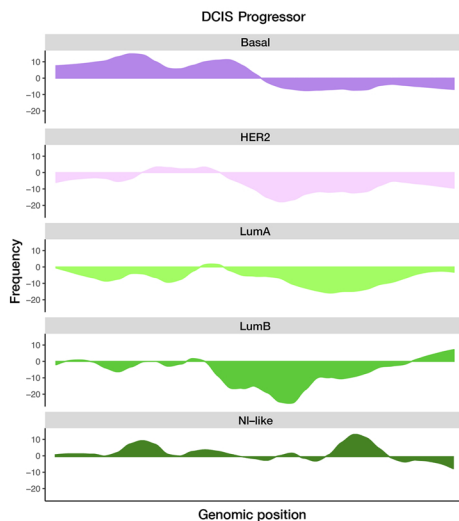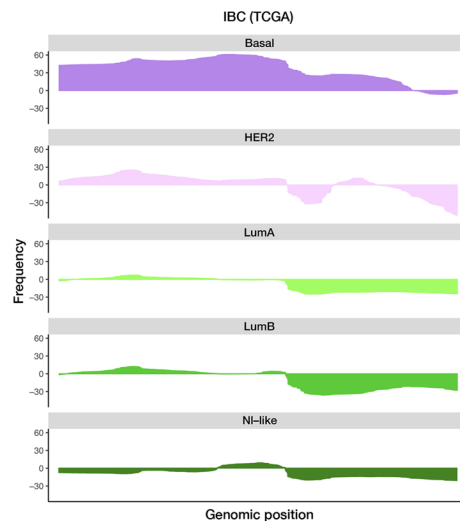

CHR 7

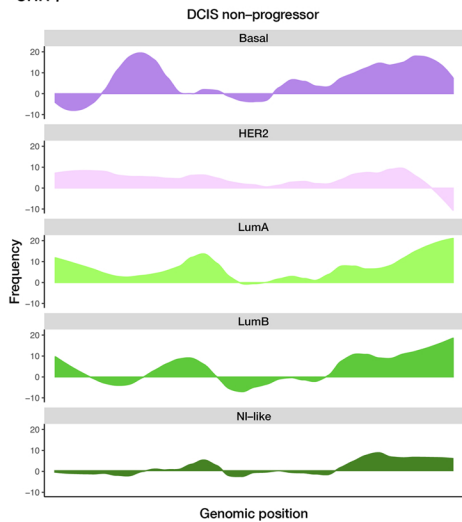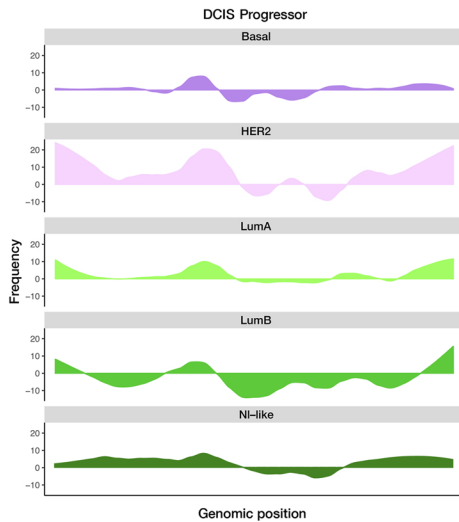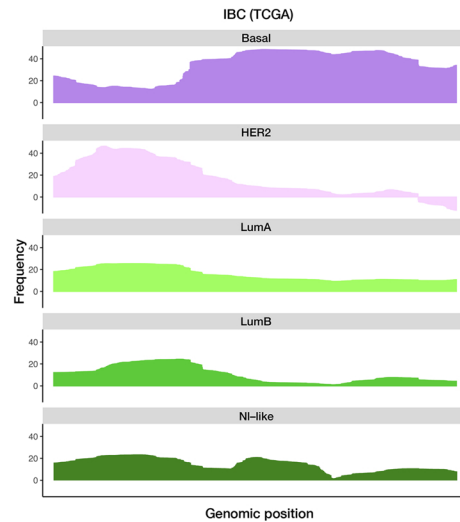

CHR 8

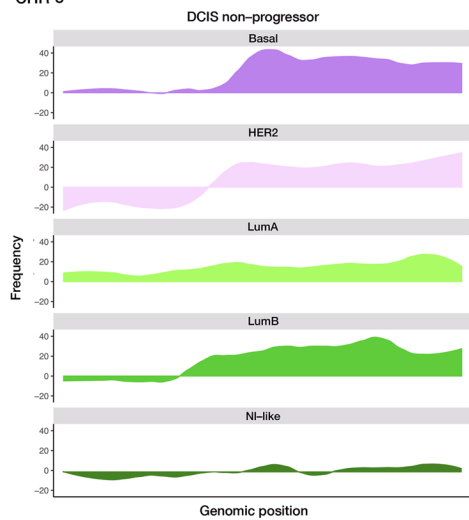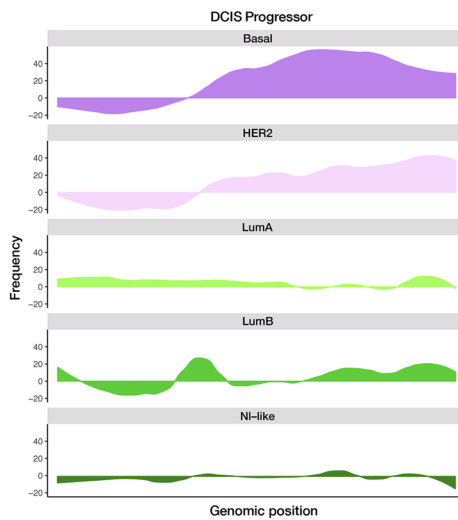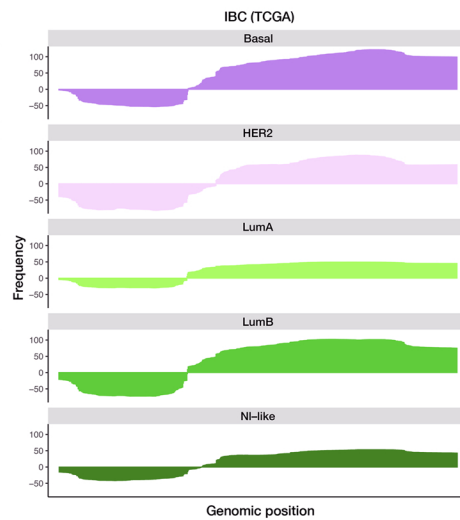

CHR 9

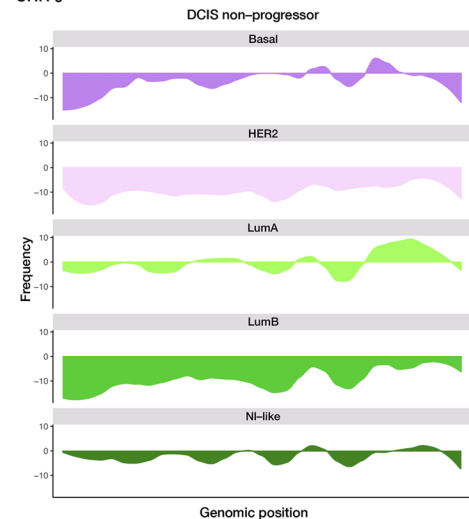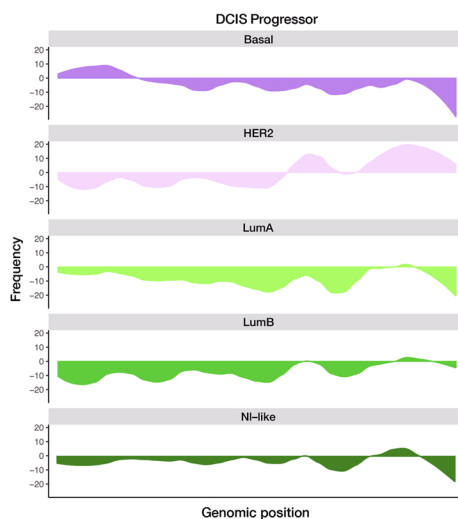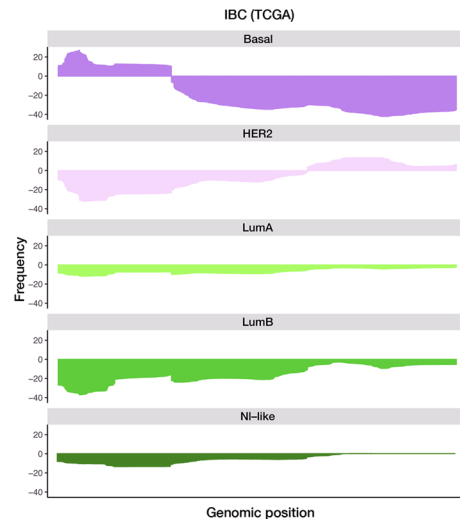

CHR 10

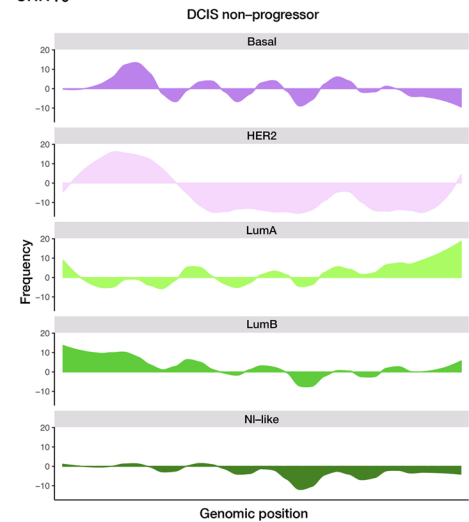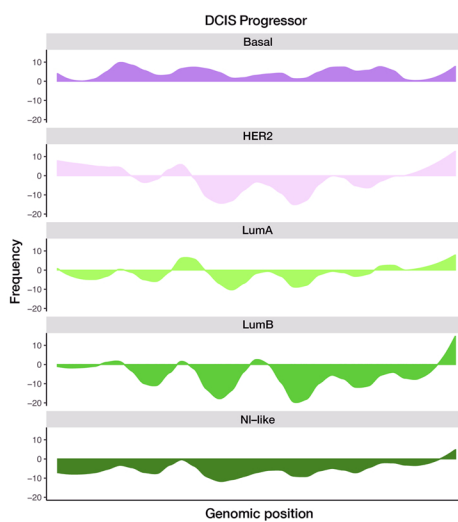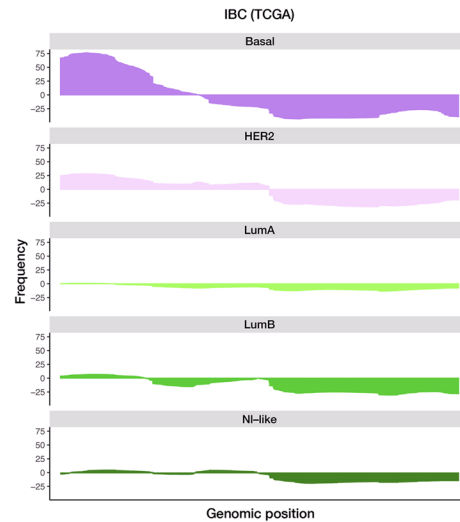

CHR 11

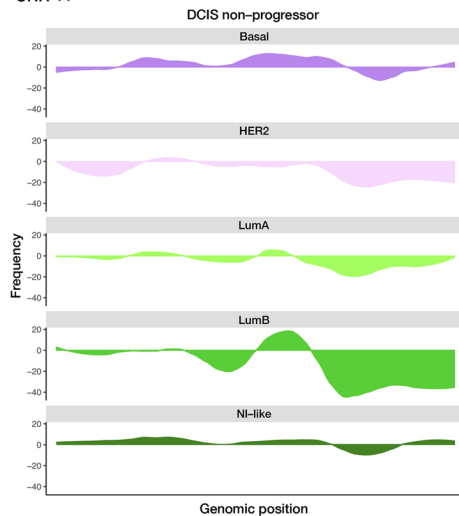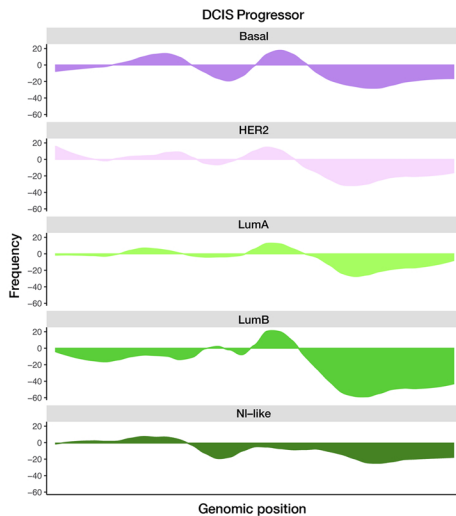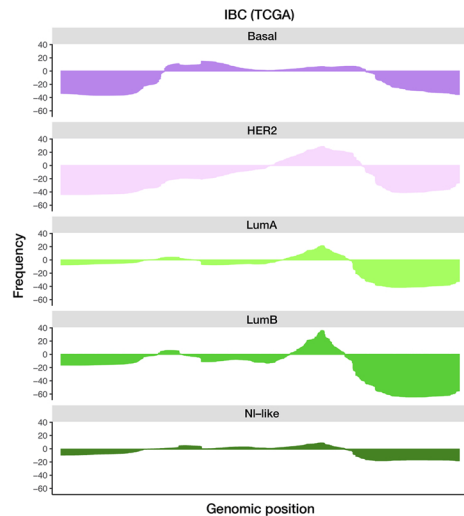

CHR 12

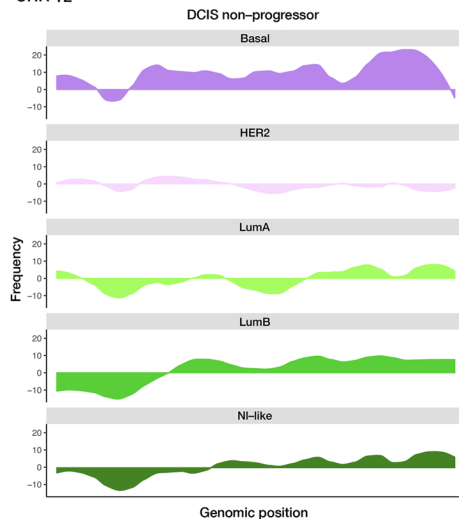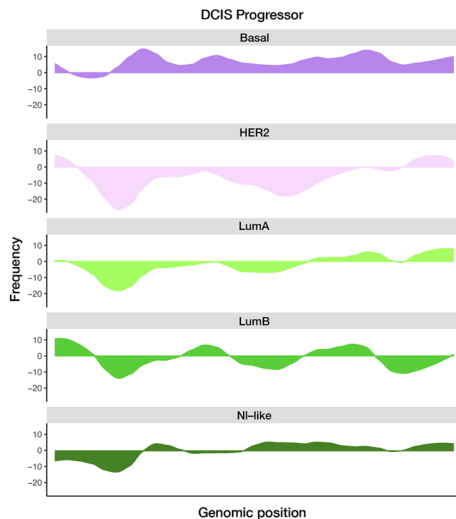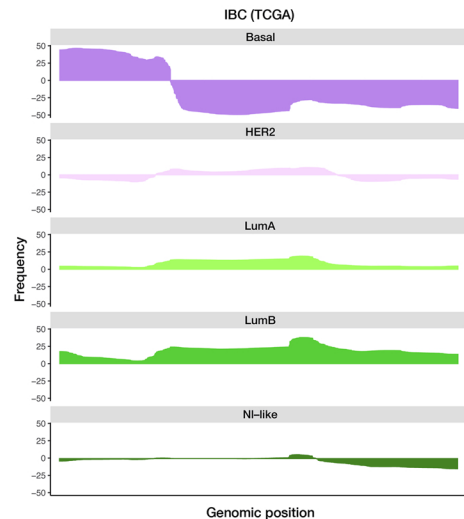

CHR 13

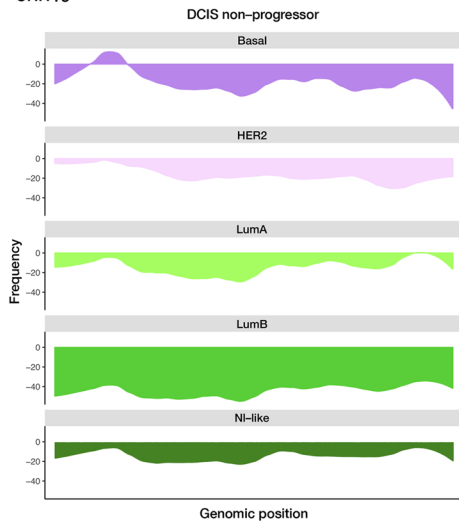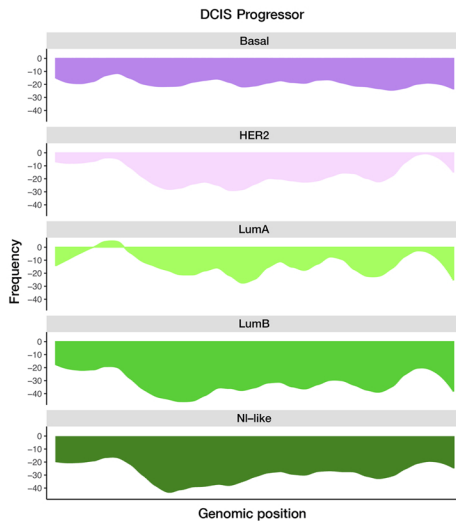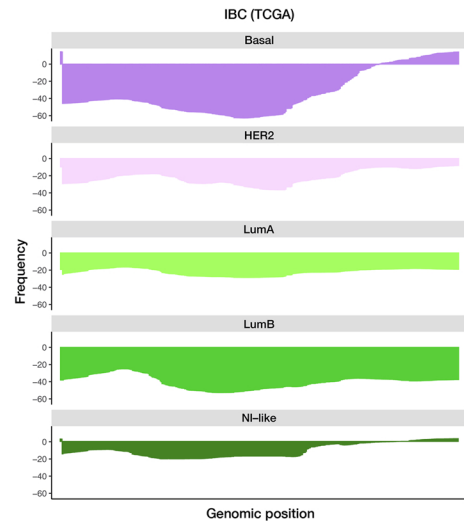

CHR 14

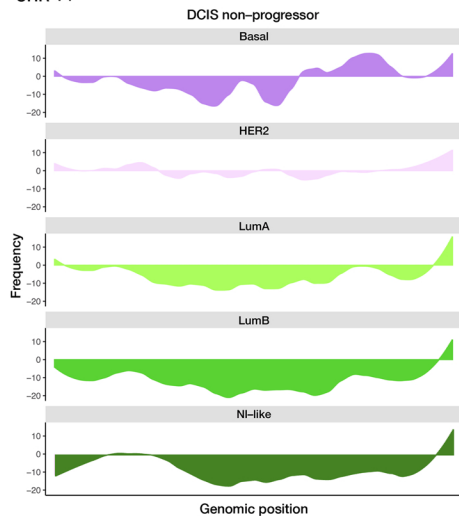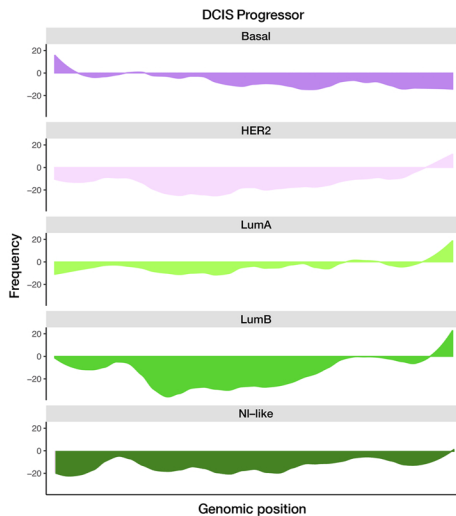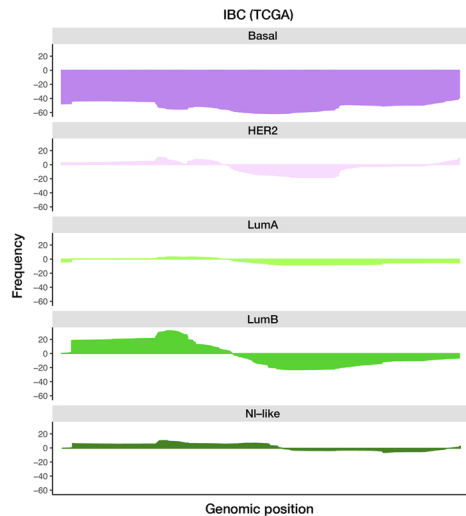

CHR 15

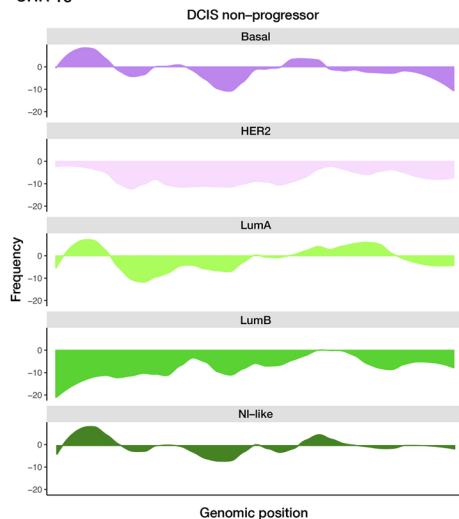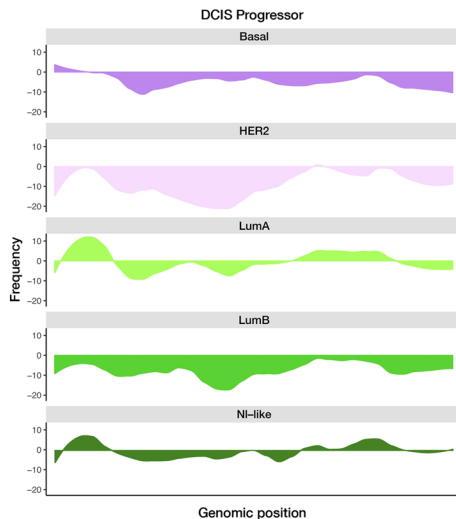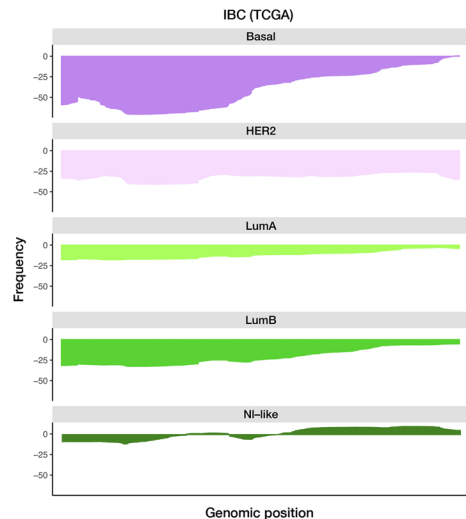

CHR 16

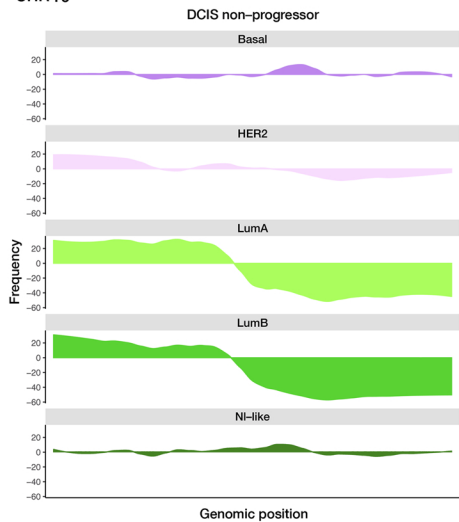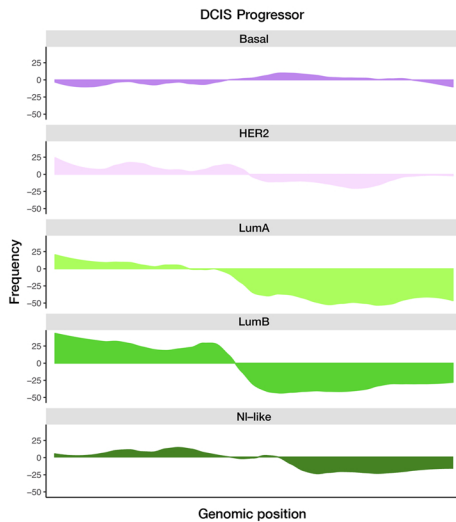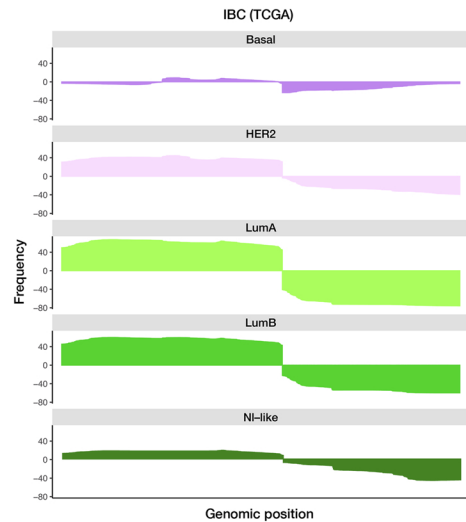

CHR 17

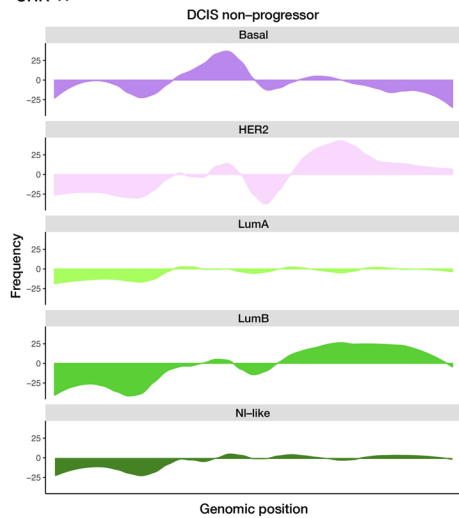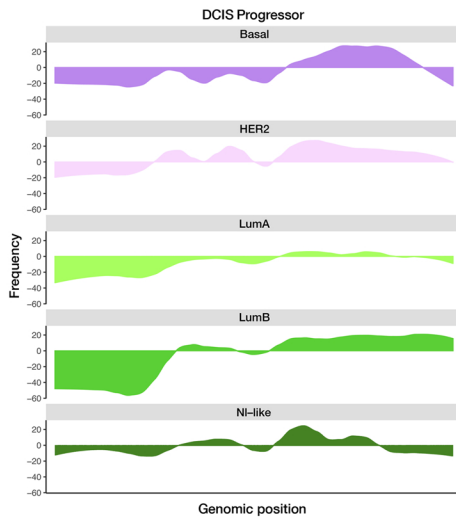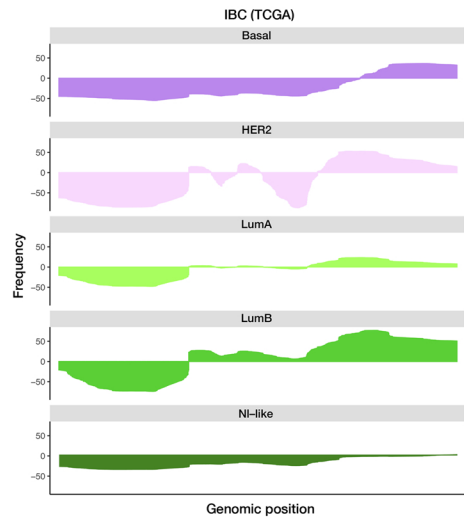

CHR 18

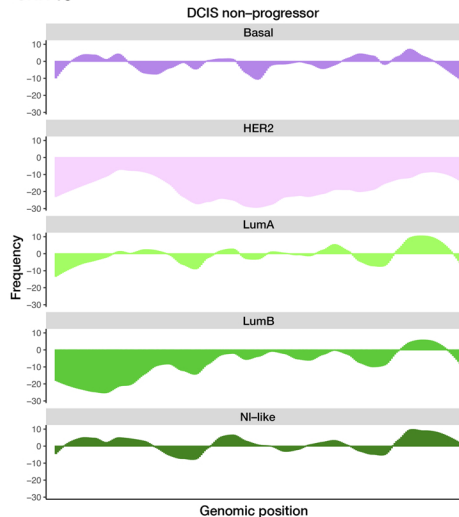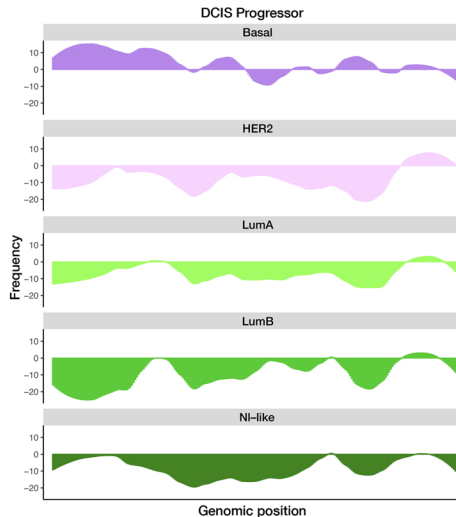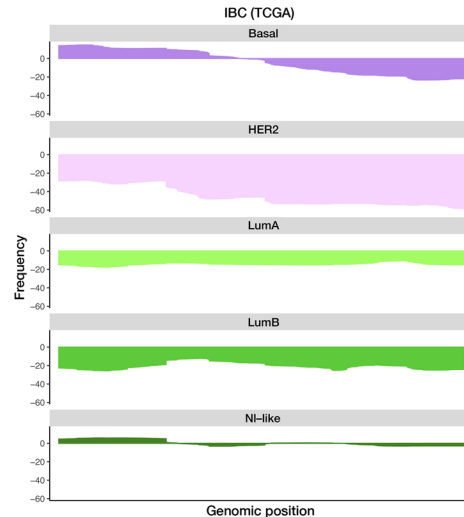

CHR 19

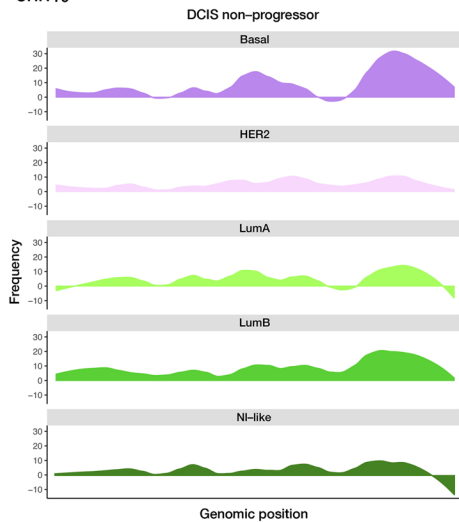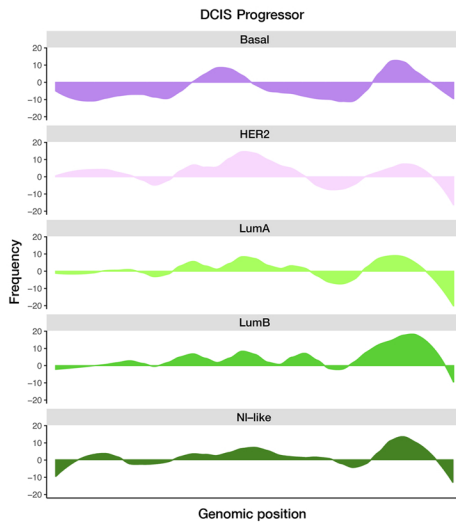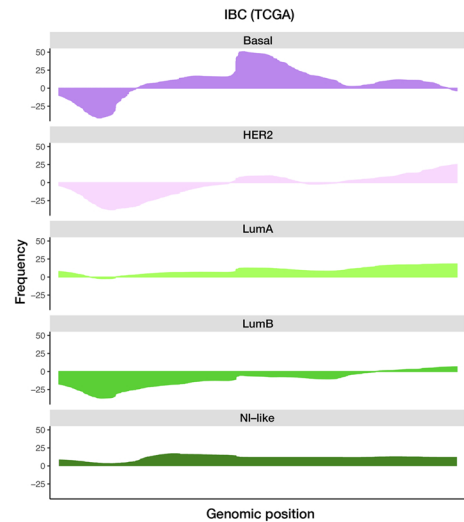

CHR 20

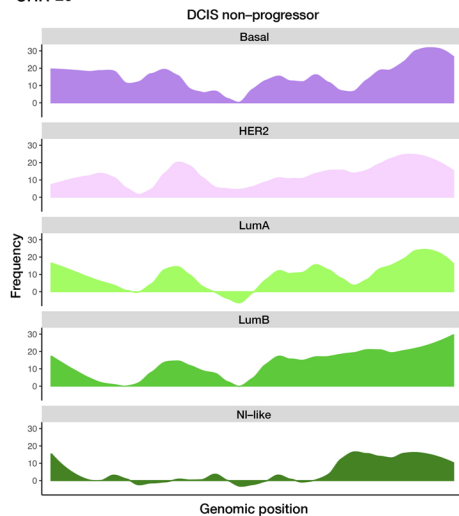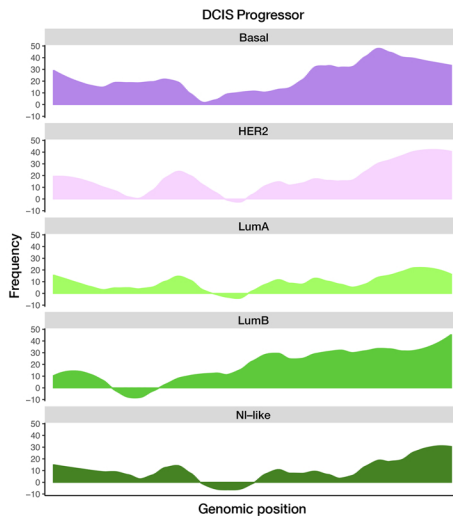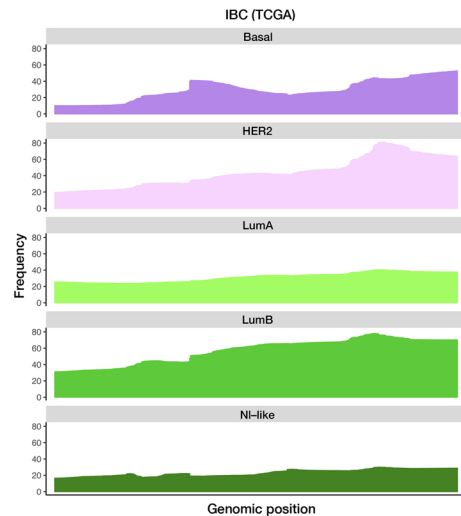

CHR 21

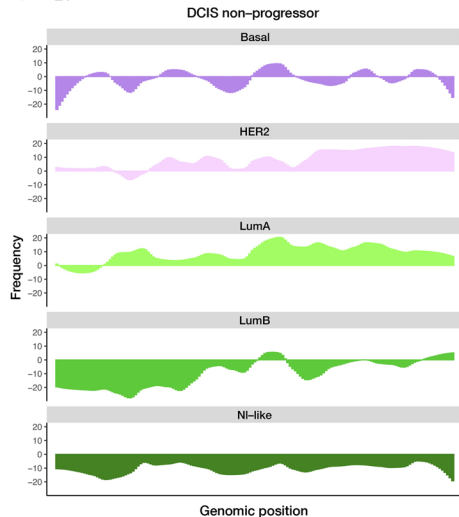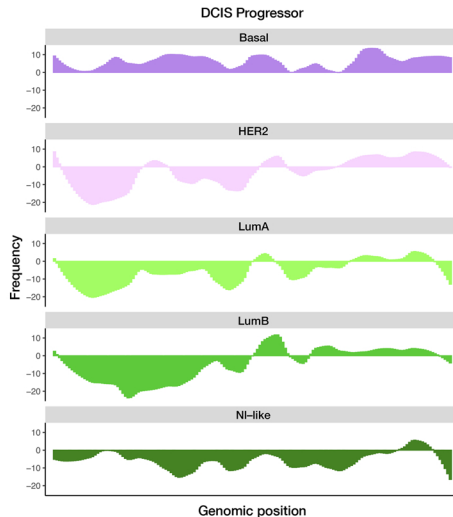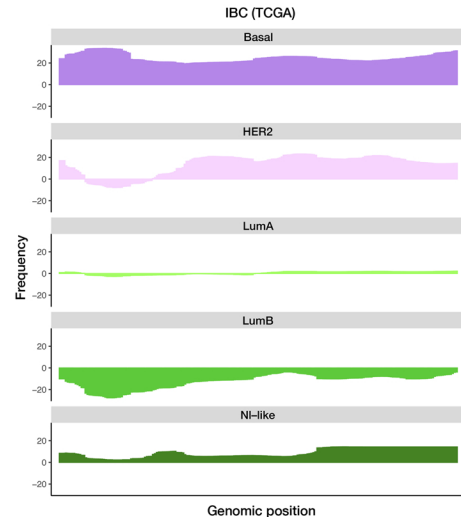

CHR 22

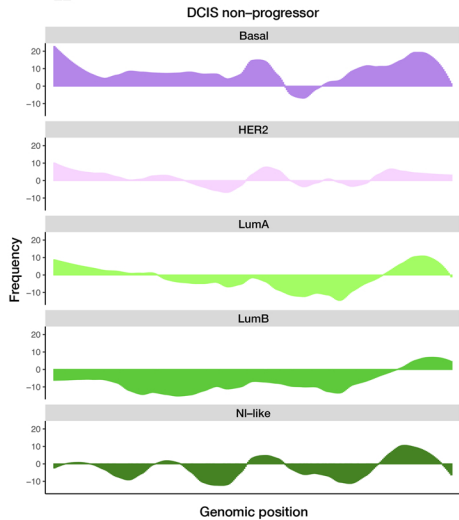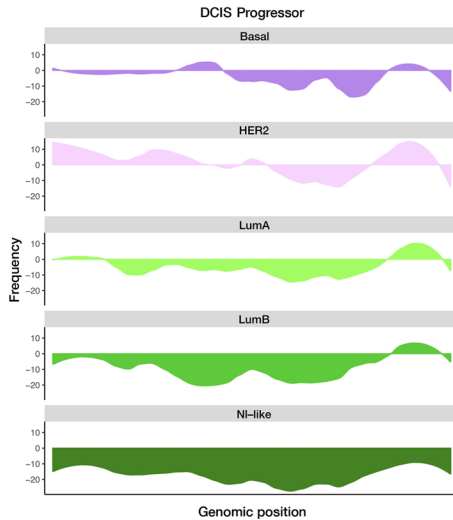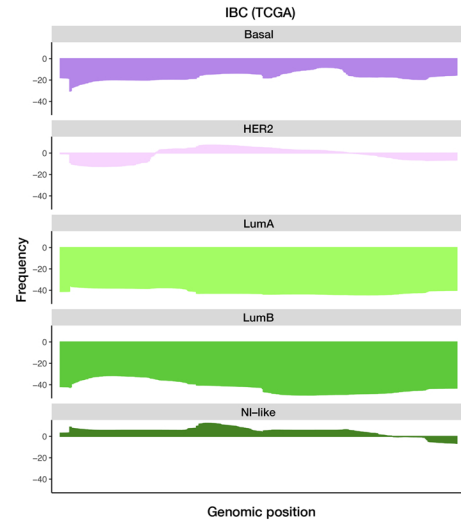

Supplement: 13058_2024_1927_MOESM13_ESM.pdf [file 13058_2024_1927_MOESM13_ESM.pdf]
