# Supplementary material for: Multimodal genome-wide survey of progressing and non-progressing breast ductal carcinoma in-situ
Source: PubMed Central journal article supplement (PMC11616160; doi:10.1186/s13058-024-01927-1), 2024-12-04

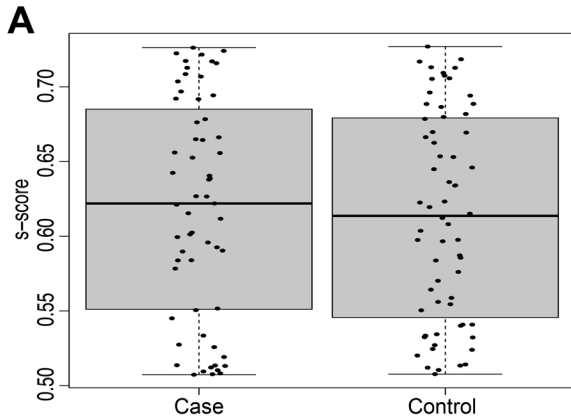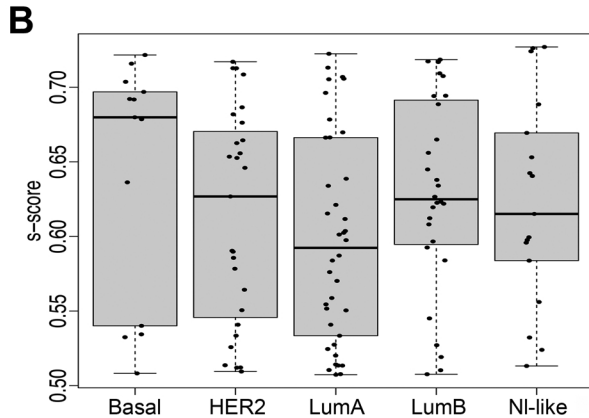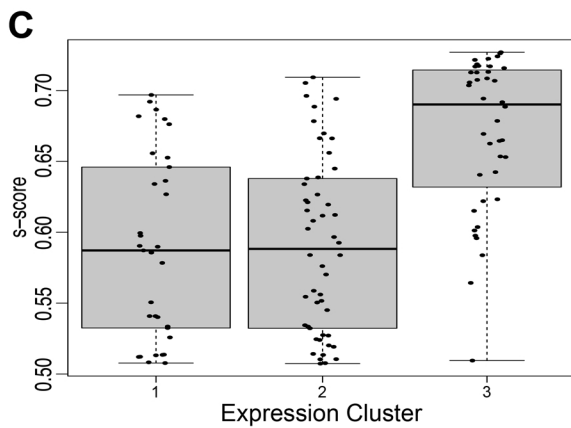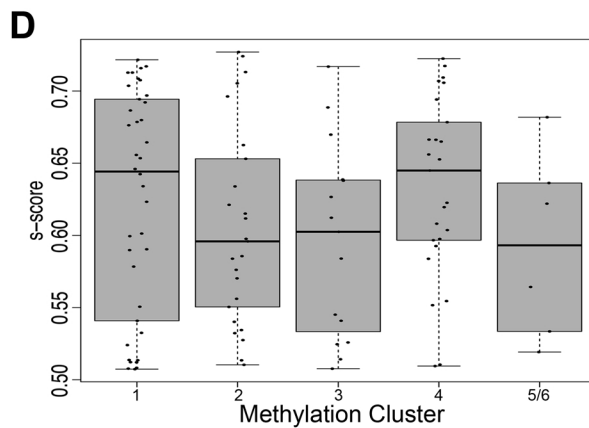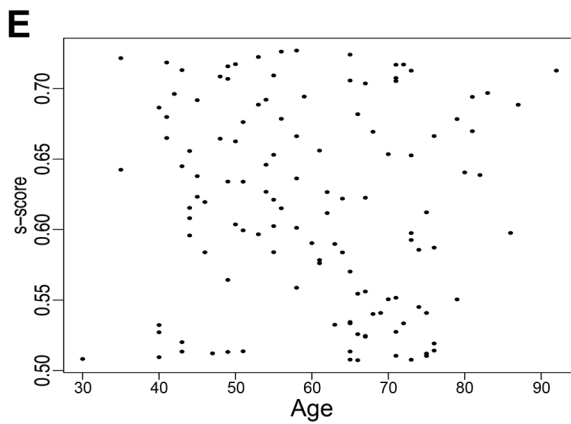

Supplement: 13058_2024_1927_MOESM14_ESM.pdf [file 13058_2024_1927_MOESM14_ESM.pdf]
